# Supplementary material
Source: ML conference proceedings conference paper supplement (https://openreview.net/forum?id=rGN3X9jnEg)
Supplement: supplementary_material [file attachment]

## A Defining Markov locality and relating it to $p$ -locality

To gain intuition for how  $p$ -locality functions, we will introduce another notion of locality, called *Markov locality*, which will use the language of Markov blankets. We will prove that under relatively relaxed conditions  $p$ -locality and Markov locality are equivalent. This will allow us to relate the notion of locality to various graph structures commonly used to represent probability distributions, and will be a key step in proving Properties 2.1 and 2.2.

We start by defining the Markov boundary,  $\mathcal{M}(X, S)$ , of a random variable  $X$  contained in a set of random variables  $S$ , as a minimal set such that  $p(X|S) = p(X|\mathcal{M}(X, S))$ . The Markov boundary defines a minimal set of variables such that, conditioned on these variables, conditioning on *no additional* random variables in  $S$  changes the probability of  $X$  [39]. Similarly, we define the Markov blanket,  $M(X, S)$  for  $X$  in  $S$  as any set of variables such that conditioning on  $M(X, S)$ , makes  $X$  conditionally independent from all other variables [39]. In this way, the Markov boundary is a Markov blanket but not all blankets are boundaries.

**Definition A.1. Markov locality:** Given probability distribution  $p(\mathbf{Z})$  and function  $f : \mathbb{R}^{N_x + N_\Theta} \rightarrow \mathbb{R}^{N_\Theta}$ , the update function  $f(\mathbf{Z})$  is Markov-local with respect to the distribution  $p$  over  $\mathbf{Z}$  if and only if  $\forall k$ :

$$\exists \mathbf{Z} \in \Omega \text{ s.t. } \frac{\partial f_k(\mathbf{Z})}{\partial \mathbf{Z}_i} \neq 0 \Rightarrow \mathbf{Z}_i \in \mathcal{M}(\Theta_k, \mathbf{Z}). \quad (\text{A.1})$$

Markov locality requires that the set of variables used in the parameter update  $f_k(\mathbf{Z})$  is a subset of the Markov boundary of the parameter itself. A Markov boundary can be thought of as the set of variables that ‘locally’ communicate with the parameter  $\Theta_k$ , thus providing a natural measure of locality.

Importantly, for Markov-locality to be of use, we would like the Markov boundaries of random variables in the model of interest to be unique. Without this requirement there will be ambiguity, for a given  $p$ , in terms of which updates are considered local and which are not. To guarantee this, we ask that the conditional independence relationships implied by  $p$  satisfy four properties, commonly referred to as graphoid properties [39, 40]. A sufficient condition for these to hold is that the distribution have a strictly positive density (see Appendix for more details B). With this, and some mild regularity assumptions, we can prove the following equivalence between Markov locality and  $p$ -locality:

**Theorem A.1.** Assume all quantities are as in A.1, that the conditional independence relationships implied by  $p(\mathbf{Z})$  satisfy the four graphoid properties given in Section B, and that mild regularity assumptions are satisfied by the joint distribution (see Section C.1). Then Equation 2 holds if and only if Equation A.1 also holds.

*Proof.* This proof relies on Lemma A.1, proved below.

We wish to prove Eq. 2  $\iff$  Eq. A.1. It suffices to show the following:

$$\mathbb{E}_p \left[ \left( \frac{\partial \log p(\mathbf{Z}_i | \mathbf{Z}_{\neq i})}{\partial \Theta_k} \right)^2 \right] \neq 0 \iff \mathbf{Z}_i \in \mathcal{M}(\Theta_k, \mathbf{Z}) \quad (\text{A.2})$$

Using the contrapositive for the left and right implications separately shows that Equation A.2 is equivalent to

$$\mathbb{E}_p \left[ \left( \frac{\partial \log p(\mathbf{Z}_i | \mathbf{Z}_{\neq i})}{\partial \Theta_k} \right)^2 \right] = 0 \iff \mathbf{Z}_i \notin \mathcal{M}(\Theta_k, \mathbf{Z}), \quad (\text{A.3})$$

which means that it suffices to prove Equation A.3 for the proof. Observe that

$$E_p \left[ \left( \frac{\partial \log p(\mathbf{Z}_i | \mathbf{Z}_{\neq i})}{\partial \Theta_k} \right)^2 \right] = 0 \iff \frac{\partial \log p(\mathbf{Z}_i | \mathbf{Z}_{\neq i})}{\partial \mathbf{Z}_k} = 0 \quad \forall \mathbf{Z} \in \Omega, \quad (\text{A.4})$$

which follows from the regularity assumptions. From here, the proof follows by Lemma A.1.

□

**Lemma A.1.** Let  $\mathbf{X}, \Theta, \mathbf{Z}, k$  and  $i$ , and  $p$  be defined as in Theorem A.1. Then

$$\frac{\partial \log p(\mathbf{Z}_i | \mathbf{Z}_{\neq i})}{\partial \mathbf{Z}_k} = 0 \quad \forall \mathbf{Z} \in \Omega \iff \mathbf{Z}_i \notin \mathcal{M}(\mathbf{Z}_k, \mathbf{Z}) \quad (\text{A.5})$$

*Proof.* First, observe that

$$\begin{aligned} \frac{\partial \log p(\mathbf{Z}_i | \mathbf{Z}_{\neq i})}{\partial \mathbf{Z}_k} &= 0 \quad \forall \mathbf{Z} \in \Omega \\ \iff \frac{\partial p(\mathbf{Z}_i | \mathbf{Z}_{\neq i})}{\partial \mathbf{Z}_k} &= 0 \quad \forall \mathbf{Z} \in \Omega \end{aligned} \quad (\text{A.6})$$

by the chain rule. By applying the fundamental theorem of calculus to this derivative, which we can do by the assumption of differentiability on  $\mathbb{R}$ , we find that  $p(\mathbf{Z}_i | \mathbf{Z}_{\neq i})$  is constant w.r.t.  $\mathbf{Z}_k$  on  $\Omega$  so that

$$p(\mathbf{Z}_i | \mathbf{Z}_{\neq i}) = p(\mathbf{Z}_i | \mathbf{Z}_{\neq i}) \int_{\mathbb{R}} p(\mathbf{Z}_k | \mathbf{Z}_{\neq \{i,k\}}) d\mathbf{Z}_k \quad (\text{A.7})$$

$$= \int_{\mathbb{R}} p(\mathbf{Z}_i, \mathbf{Z}_k | \mathbf{Z}_{\neq \{i,k\}}) d\mathbf{Z}_k = p(\mathbf{Z}_i | \mathbf{Z}_{\neq \{i,k\}}) \quad (\text{A.8})$$

where we have also used that a probability distribution integrates to 1, and that  $p(\mathbf{Z}_k | \mathbf{Z}_{\neq \{i,k\}})$  will be equal to zero outside  $\Omega$ . Because  $\mathbf{Z} \in \Omega$  is arbitrary, from the above  $\mathbf{Z}_i$  is independent of  $\mathbf{Z}_k$  given the other random variables in  $\mathbf{Z}$ . Using Lemma B.1 (which we can do by assumption of the graphoid properties), we see that if  $\frac{\partial \log p(\mathbf{Z}_i | \mathbf{Z}_{\neq i})}{\partial \mathbf{Z}_k} = 0 \quad \forall \mathbf{Z} \in \Omega$ , by Eq. A.6 - A.8,  $\mathbf{Z}_i \notin \mathcal{M}(\mathbf{Z}_k, \mathbf{Z})$ . Conversely, if we start with the assumption that  $\mathbf{Z}_i \notin \mathcal{M}(\mathbf{Z}_k, \mathbf{Z})$ , we immediately get  $\mathbf{Z}_k \notin \mathcal{M}(\mathbf{Z}_i, \mathbf{Z})$ , by Lemma B.1, and see that  $p(\mathbf{Z}_i | \mathbf{Z}_{\neq i})$  must not be a function of  $\mathbf{Z}_k$  for all  $\mathbf{Z}$ ; thus, the derivative w.r.t.  $\mathbf{Z}_k$  is equal to zero for  $\mathbf{Z} \in \Omega$ . Applying Equation A.6 completes the proof. □

## B Notes on Probabilistic Graphical Models

In this section we compile several properties, definitions, and results on Markov boundaries and Probabilistic Graphical Models (PGMs) that underlie Theorem A.1, and Properties 2.1 and 2.2. We begin by setting up notation. Let us assume that we have a joint probability distribution,  $P$ , over a set of random variables  $S$ , and that  $W, X, Y, Z \subset S$ , and  $U, V, T \in S$ . We use  $X \perp\!\!\!\perp Y | Z$  to mean that the set of random variables  $X$  is independent of the set  $Y$  given set  $Z$ , and assume that the reader is familiar with the notion of a directed graph, an undirected graph, and graph separation. If a set  $X$  contains only a single random variable  $U$  then we abuse notation and write  $U$  in place of  $X$ .

The following four properties—known as the *graphoid properties* (or axioms—see e.g. [39, 40])—are useful for getting well-behaved Markov boundaries and in assigning graphical representation to probability distributions:

**Definition B.1.** *Pseudo-graphoid properties:*

- *Symmetry:*  $X \perp\!\!\!\perp Y | Z \implies Y \perp\!\!\!\perp X | Z$
- *Decomposition:*  $X \perp\!\!\!\perp Y, W | Z \implies X \perp\!\!\!\perp Y | Z \ \& \ X \perp\!\!\!\perp W | Z$
- *Weak union:*  $X \perp\!\!\!\perp Y, W | Z \implies X \perp\!\!\!\perp Y | W, Z$
- *Intersection:*  $X \perp\!\!\!\perp Y | Z, W \ \& \ X \perp\!\!\!\perp W | Z, Y \implies X \perp\!\!\!\perp Y, W | Z$

Importantly, it is known that these properties are satisfied when we have a density  $p$  that is strictly positive w.r.t. to its base product measure [40]. Here, measure is used in a measure theoretic sense; e.g. we have assumed throughout the paper that the base measure is simply a product of a multi-dimensional Lebesgue measure over  $\mathbb{R}^{k_1}$ , for some  $k_1$ , and a counting measure over  $\mathbb{N}^{k_2}$  or some subset of  $\mathbb{N}^{k_2}$ , for some  $k_2$ . Roughly speaking, this positivity property means that there are no purely deterministic relationships between variables.

The key result that we use to guarantee that the Markov boundaries we discuss in the paper are well-defined is given in [39]. We state a paraphrased and shortened version below for completeness:

**Theorem B.1.** *Theorem 4, Chapter 3 in [39]: every  $P$  with conditional independence relations satisfying the four pseudo-graphoid properties has a unique Markov boundary for each  $X$ .*

We now add two more simple results on Markov boundaries, used in the proof of Theorem A.1:

**Lemma B.1.** *If  $P$  has conditional independence relations satisfying the four pseudo-graphoid properties we have:*

- for every  $U, V \in S$ ,  $U \in \mathcal{M}(V, S) \iff V \in \mathcal{M}(U, S)$
- for every  $U \in S$ ,  $\mathcal{M}(U, S)$  is contained in every Markov blanket of  $U$ .

These follow simply from the graphoid properties so we omit the proof.

Lastly, we make specific what we mean when we say that a graph is an undirected or directed graphical model for a distribution.

**Definition B.2.** *Let  $\mathcal{G}$  be an undirected graph where each node corresponds to a random variable in  $S$ . We say that  $\mathcal{G}$  is an **Undirected Graph (UG) for  $P$**  if whenever  $X$  and  $Y$  are separated by  $Z$  in  $\mathcal{G}$ ,  $X \perp\!\!\!\perp Y | Z$  is true under  $P$ . Note that this corresponds to the notion of I-map in [39].*

**Definition B.3.** *Let  $\mathcal{G}_d$  be a directed graph with each vertex corresponding to a random variable in  $S$ . We say that  $\mathcal{G}_d$  is a **Directed Graph for  $P$**  if the variable under  $P$  corresponding to any node in the graph is conditionally independent of all variables corresponding to nodes that are non-descendants given the variables corresponding to parents. This is equivalent to  $\mathcal{G}_d$  satisfying the Markov condition described in Definition 1.9 of [41].*

## C Proofs for $p$ -locality properties

For the first two properties we assume the requirements of Theorem A.1 are satisfied. For all properties except 2.3, 2.4, and 2.8 we assume  $p$  satisfies mild regularity constraints (see Section C.1).

**Property 2.1** Assume  $\mathcal{G}_d$  is a Directed Acyclic Graph (DAG) for  $p$ . If  $\frac{\partial f_k(\mathbf{Z})}{\partial \mathbf{Z}_i} \neq 0$  for  $\mathbf{Z}_i$  that is not a parent, co-parent, or child of  $\Theta_k$  in  $\mathcal{G}_d$ , then  $f$  is not  $p$ -local.

*Proof.* By Theorem A.1 we get that  $\frac{\partial f_k(\mathbf{Z})}{\partial \mathbf{Z}_i}$  can only be non-zero on the unique Markov boundary of  $\mathbf{Z}_i$  if it is  $p$ -local. By the definition of a DAG, the parents, co-parents, and children of  $\mathbf{Z}_i$  form a Markov blanket for it (see e.g. [41] Th. 2.13). By Lemma B.1 the boundary is included in all Markov blankets so  $\frac{\partial f_k(\mathbf{Z})}{\partial \mathbf{Z}_i}$  can only be non-zero on some subset of the parents, co-parents, and children of  $\mathbf{Z}_i$ .  $\square$

**Property 2.2** Assume that  $\mathcal{G}$  defines an Undirected Graph (UG) for  $p$ . If  $\frac{\partial f_k(\mathbf{Z})}{\partial \mathbf{Z}_i} \neq 0$  for  $\mathbf{Z}_i$  that is not a neighbour of  $\Theta_k$  in  $\mathcal{G}$ , then  $f$  is not  $p$ -local.

*Proof.* As above, by Theorem A.1 we get that  $\frac{\partial f_k(\mathbf{Z})}{\partial \mathbf{Z}_i}$  can only be non-zero on the unique Markov boundary of  $\mathbf{Z}_i$  if it is  $p$ -local. A UG for a distribution is an I-map for it, and conditioning on the neighbours in an I-map renders a node independent from the other nodes in the graph by definition—thus the neighbours form a Markov blanket. By Lemma B.1 the Markov boundary is included in every blanket so  $\frac{\partial f_k(\mathbf{Z})}{\partial \mathbf{Z}_i}$  can only be non-zero on some subset of the neighbours in the UG.  $\square$

**Property 2.3** For any function  $b(\mathbf{Z}) : \mathbb{R}^{N_{\mathbf{x}}+N_{\Theta}} \rightarrow \mathbb{R}^{N_{\Theta}}$  defined such that  $b_k(\mathbf{Z}) = h_k(f_k(\mathbf{Z}), g_k(\mathbf{Z}))$ , where  $f$  and  $g$  are  $p$ -local and  $h_k$  is differentiable,  $b(\mathbf{Z})$  is also  $p$ -local.

*Proof.* Suppose that  $\frac{\partial b_k(\mathbf{Z})}{\partial \mathbf{X}_i} \neq 0$ . We need to show that  $\mathbb{E}_p \left[ \left( \frac{\partial \log p(\mathbf{Z}_i | \mathbf{Z}_{\neq i})}{\partial \Theta_k} \right)^2 \right] \neq 0$ . Knowing that  $\frac{\partial b_k(\mathbf{Z})}{\partial \mathbf{X}_i} \neq 0$ , we have:

$$\frac{\partial h_k(\mathbf{Z})}{\partial f_k} \frac{\partial f_k(\mathbf{Z})}{\partial \mathbf{Z}_i} + \frac{\partial h_k(\mathbf{Z})}{\partial g_k} \frac{\partial g_k(\mathbf{Z})}{\partial \mathbf{X}_i} \neq 0. \quad (\text{C.1})$$

This implies that either  $\frac{\partial f_k(\mathbf{Z})}{\partial \mathbf{Z}_i} \neq 0$  or  $\frac{\partial g_k(\mathbf{Z})}{\partial \mathbf{Z}_i} \neq 0$  (or both). No matter which is true, by virtue of the  $p$ -locality of  $f$  and  $g$ , we have the consequence:

$$\mathbb{E}_p \left[ \left( \frac{\partial \log p(\mathbf{Z}_i | \mathbf{Z}_{\neq i})}{\partial \Theta_k} \right)^2 \right] \neq 0, \quad (\text{C.2})$$

which concludes our proof. This demonstrates that  $p$ -local functions can be more or less arbitrarily combined without the combination losing the  $p$ -local property.  $\square$

**Property 2.4** For any function  $f(\cdot) : \mathbb{R}^{N_{\mathbf{x}}+N_{\Theta}} \rightarrow \mathbb{R}^{N_{\Theta}}$ , there exists a probability distribution  $p(\mathbf{Z})$  such that the random variable  $f(\mathbf{Z})$  with  $\mathbf{Z} \sim p(\mathbf{Z})$  is  $p$ -local.

*Proof.* We can prove this property by construction. Take  $p(\{\mathbf{X}_i : \frac{\partial f(\mathbf{X})}{\partial \mathbf{X}_i} \neq 0\} | \Theta) = \mathcal{N}(\Theta^T \Theta, \mathbf{I})$ , i.e. the distribution of every variable contained within  $f$  has mean parameter dependence on all  $\Theta$  variables. The probability distributions for all other variables  $\mathbf{Z}$  are otherwise unconstrained. Then for all  $i$  such that  $\frac{\partial f(\mathbf{X})}{\partial \mathbf{X}_i} \neq 0$ , we have:

$$\mathbb{E}_p \left[ \left( \frac{\partial \log p(\mathbf{X}_i | \mathbf{X}_{\neq i}, \Theta)}{\partial \Theta_k} \right)^2 \right] = \mathbb{E}_p \left[ \left( \frac{\partial \log p(\mathbf{X}_i | \Theta)}{\partial \Theta_k} \right)^2 \right] \quad (\text{C.3})$$

$$= \mathbb{E}_p \left[ \left( -\frac{\partial}{\partial \Theta_k} \frac{(\mathbf{X}_i - \Theta^T \Theta)^2}{2} \right)^2 \right] \quad (\text{C.4})$$

$$= \mathbb{E}_p \left[ 2 \left( (\mathbf{X}_i - \Theta^T \Theta) \Theta_k \right)^2 \right] \quad (\text{C.5})$$

$$= 4 \mathbb{E}_{p(\Theta)} \left[ \Theta_k^2 \mathbb{E}_{p(\mathbf{X}_i | \Theta)} \left[ (\mathbf{X}_i - \Theta^T \Theta)^2 \right] \right] \quad (\text{C.6})$$

$$= 4 \mathbb{E}_{p(\Theta)} \left[ \Theta_k^2 \right] \neq 0. \quad (\text{C.7})$$

$\square$

**Property 2.5** The derivative of the log joint distribution  $\frac{\partial \log p(\mathbf{X}, \Theta)}{\partial \Theta}$  is  $p$ -local.

Here, it's more useful to work with the equivalent (contrapositive) requirement for  $p$ -locality, i.e., we need to show  $\forall k, i$ :

$$\mathbb{E}_p \left[ \left( \frac{\partial \log p(\mathbf{Z}_i | \mathbf{Z}_{\neq i})}{\partial \Theta_k} \right)^2 \right] = 0 \Rightarrow \frac{\partial^2 \log p(\mathbf{X}, \Theta)}{\partial \mathbf{Z}_i \partial \Theta_k} = 0. \quad (\text{C.8})$$

*Proof.* First, we see that:

$$\mathbb{E}_p \left[ \left( \frac{\partial \log p(\mathbf{Z}_i | \mathbf{Z}_{\neq i})}{\partial \Theta_k} \right)^2 \right] = 0 \quad (\text{C.9})$$

$$\Rightarrow \frac{\partial \log p(\mathbf{Z}_i | \mathbf{Z}_{\neq i})}{\partial \Theta_k} = 0 \quad (\text{C.10})$$

$$\Rightarrow \frac{\partial^2 \log p(\mathbf{Z}_i | \mathbf{Z}_{\neq i})}{\partial \mathbf{Z}_i \partial \Theta_k} = 0, \quad (\text{C.11})$$

where the first implication follows from the fact that the Fisher Information integral is effectively a weighted sum of elements, each of which is  $\geq 0$ . If the function on the right were nonzero for some  $\mathbf{Z}$ , then the Fisher Information would also be nonzero. Assuming that  $\log p$  has differentiable partial derivatives, we can interchange the order of differentiation, giving:

$$\Rightarrow \frac{\partial^2 \log p(\mathbf{Z}_i | \mathbf{Z}_{\neq i})}{\partial \Theta_k \partial \mathbf{Z}_i} = 0 \quad (\text{C.12})$$

$$\Rightarrow \frac{\partial}{\partial \Theta_k} \left[ \frac{\partial}{\partial \mathbf{Z}_i} [\log p(\mathbf{Z}_i | \mathbf{Z}_{\neq i}) + \log p(\mathbf{Z}_{\neq i})] \right] = 0 \quad (\text{C.13})$$

$$\Rightarrow \frac{\partial}{\partial \Theta_k} \left[ \frac{\partial}{\partial \mathbf{Z}_i} [\log p(\mathbf{Z})] \right] = 0 \quad (\text{C.14})$$

$$\Rightarrow \frac{\partial^2 \log p(\mathbf{Z})}{\partial \mathbf{Z}_i \partial \Theta_k} = 0, \quad (\text{C.15})$$

which concludes the proof.  $\square$

**Property 2.6** For a probability distribution given by  $p(\mathbf{Z}) = \frac{1}{Z} \exp(-E(\mathbf{Z}))$ , the expression  $\frac{\partial}{\partial \Theta} E(\mathbf{Z})$  is  $p$ -local.

*Proof.* The proof is almost identical to the proof for Property 2.5. From Property 2.5, we have that:

$$\mathbb{E}_p \left[ \left( \frac{\partial \log p(\mathbf{Z}_i | \mathbf{Z}_{\neq i})}{\partial \Theta_k} \right)^2 \right] = 0 \quad (\text{C.16})$$

$$\Rightarrow \frac{\partial^2 \log p(\mathbf{Z})}{\partial \mathbf{Z}_i \partial \Theta_k} = 0. \quad (\text{C.17})$$

Using our definition of  $p$ , we have:

$$\Rightarrow \frac{-\partial^2 (E(\mathbf{Z}) + \log Z)}{\partial \mathbf{Z}_i \partial \Theta_k} = 0 \quad (\text{C.18})$$

$$\Rightarrow \frac{\partial^2 E(\mathbf{Z})}{\partial \mathbf{Z}_i \partial \Theta_k} = 0, \quad (\text{C.19})$$

which concludes the proof.  $\square$

**Property 2.7** If the marginal parameter distribution factorizes as  $p(\Theta) = \prod_k p(\Theta_k)$ , i.e. the parameters are independent from one another, then the score function  $\frac{\partial \log p(\mathbf{X} | \Theta)}{\partial \Theta}$  is  $p$ -local.

*Proof.* Again, we make heavy use of Property 2.5, which states:

$$\mathbb{E}_p \left[ \left( \frac{\partial \log p(\mathbf{Z}_i | \mathbf{Z}_{\neq i}, \Theta)}{\partial \Theta_k} \right)^2 \right] = 0 \Rightarrow \frac{\partial^2 \log p(\mathbf{Z})}{\partial \mathbf{Z}_i \partial \Theta_k} = 0. \quad (\text{C.20})$$

It is important to note that the left-hand equation only holds true if  $\mathbf{Z}_i \neq \Theta_k$ : under  $p$ -locality, an update equation for parameter  $\Theta_k$  can always include its own value. So for the remainder of the proof we will assume that  $\mathbf{Z}_i \neq \Theta_k$ . Now,  $\log(p(\mathbf{X} | \Theta)) = \log p(\mathbf{Z}) - \log p(\Theta)$ . We also have:

$$\frac{\partial^2 \log p(\Theta)}{\partial \mathbf{Z}_i \partial \Theta_k} = \frac{\partial^2 \sum_k \log p(\Theta_k)}{\partial \mathbf{Z}_i \partial \Theta_k} = 0, \quad (\text{C.21})$$

where for the last equality we have used the assumption that  $\mathbf{Z}_i \neq \Theta_k$ . These two equations collectively imply:

$$\Rightarrow \frac{\partial^2 \log p(\mathbf{X} | \Theta)}{\partial \mathbf{Z}_i \partial \Theta_k} = \frac{\partial^2 \log p(\mathbf{Z}) - \log p(\Theta)}{\partial \mathbf{Z}_i \partial \Theta_k} = 0, \quad (\text{C.22})$$

which concludes the proof.  $\square$

**Property 2.8** For a mixture distribution  $p_{12}(\mathbf{Z}, \gamma) = p_1(\mathbf{Z})^\gamma p_2(\mathbf{Z})^{1-\gamma} p(\gamma)$  for some binary variable  $\gamma \in \{0, 1\}$  with nonzero probabilities, if  $f(\mathbf{Z})$  is  $p_1$ -local (or equivalently  $p_2$ -local), then  $f(\mathbf{Z})$  is  $p_{12}$ -local.

*Proof.* We again work with the contrapositive definition of  $p$ -locality, observing that:

$$\mathbb{E}_{p_{12}(\mathbf{Z}, \gamma)} \left[ \left( \frac{\partial \log p_{12}(\mathbf{Z}_i | \mathbf{Z}_{\neq i})}{\partial \Theta_k} \right)^2 \right] = 0 \quad (\text{C.23})$$

$$\Rightarrow \sum_{k \in \{0, 1\}} p(\gamma = k) \mathbb{E}_{p_k(\mathbf{Z})} \left[ \left( \frac{\partial \log p_k(\mathbf{Z}_i | \mathbf{Z}_{\neq i})}{\partial \Theta_k} \right)^2 \right] = 0 \quad (\text{C.24})$$

$$\Rightarrow \mathbb{E}_{p_1(\mathbf{X}; \Theta)} \left[ \left( \frac{\partial \log p_1(\mathbf{Z}_i | \mathbf{Z}_{\neq i})}{\partial \Theta_k} \right)^2 \right] = 0 \quad (\text{C.25})$$

$$\Rightarrow \frac{f_k(\mathbf{X})}{\partial \mathbf{Z}_i} = 0, \quad (\text{C.26})$$

where the third implication follows from the fact that if the sum of two nonnegative quantities is zero, then *both* quantities are zero, and the final implication holds from the  $p_1$ -locality of  $f(\mathbf{Z})$ .  $\square$

### C.1 Regularity of Joint distribution

For several of these properties we enforce mild regularity constraints on the density. This is because we want the integral of the squared score being equal to zero to imply that the score itself is equal to zero. A sufficient condition for this is that the joint density function and partial derivatives w.r.t.  $\Theta_k \forall k$  are, for every fixed value of  $\mathbf{Z}$ 's discrete elements, continuous functions of  $\mathbf{Z}$ 's continuous elements.

## D Locality for a linear continuous Boltzmann machine

Consider the following example of a simplified linear recurrent neuron model with synaptic weight matrices  $\mathbf{W}$ . The joint distribution is given by:

$$p(\mathbf{r}, \mathbf{W}) = \frac{1}{Z} e^{-E(\mathbf{r}, \mathbf{W})} \quad (\text{D.1})$$

$$E(\mathbf{r}, \mathbf{W}) = \left( \frac{1}{2\tau} \|\mathbf{r}\|_2^2 - \frac{1}{2} \mathbf{r}^T \mathbf{W} \mathbf{r} + \frac{1}{2} \|\mathbf{W}\|_2^2 \right) / \sigma^2 \quad (\text{D.2})$$

$$= \left( \frac{1}{2\tau} \sum_i \mathbf{r}_i^2 - \frac{1}{2} \sum_{ij} \mathbf{W}_{ij} \mathbf{r}_i \mathbf{r}_j + \frac{1}{2} \sum_{ij} \mathbf{W}_{ij}^2 \right) / \sigma^2, \quad (\text{D.3})$$

where  $\mathbf{W}$  is assumed to be a symmetric matrix. To see why this probability distribution is relevant for neuroscience, we first note that  $E$  is a linear, continuous analog of the Hopfield energy function, which is also used for discrete-valued Boltzmann machines. There are two critical differences between this probability distribution and the linear feedforward network explored in Section 2.4: first, this distribution corresponds to the *undirected graphical model* shown in Figure 1c, as opposed to the DAG shown in Figure 1a; second, the marginal distribution is not a free parameter that we can choose with convenient factorization properties if we want our joint distribution to give us a version of  $p$ -locality that corresponds with our concept of biological locality. For undirected graphical models, one typically is required to define the joint distribution first, and compute conditional distributions explicitly through Bayes theorem or approximate through some form of MCMC sampling. In our case, we can see that  $p(\mathbf{r} | \mathbf{W})$  corresponds to the steady-state distribution of a stochastic differential equation using  $E$  to perform Langevin sampling:

$$d\mathbf{r}_i = - [\nabla_{\mathbf{r}_i(t)} E(\mathbf{r}_i(t), \mathbf{W}) \sigma^2] dt + \sigma d\mathbf{B}_i(t) \quad (\text{D.4})$$

$$= \left[ -\frac{1}{\tau} \mathbf{r}_i(t) + \sum_j \mathbf{W}_{ij} \mathbf{r}_j(t) \right] dt + \sigma d\mathbf{B}_i(t), \quad (\text{D.5})$$

where here  $\mathbf{B}_i(t)$  corresponds to uncorrelated Brownian noise injected into the system. These stochastic sampling dynamics correspond to a noisy linear recurrent network. Therefore,  $p(\mathbf{r}|\mathbf{W})$  corresponds to the steady-state stimulus response distribution of a linear recurrent network.

Let's ask: for which neural indices  $k$  can we have  $\frac{\partial}{\partial \mathbf{r}_k} f_{\mathbf{W}_{ij}}(\mathbf{r}) \neq 0$  so that the function  $f$  is still  $p$ -local? For  $f$  to remain  $p$ -local, we would need  $\mathbb{E}_p \left[ \left( \frac{\partial \log p(\mathbf{r}_k | \mathbf{r}_{\neq k}, \mathbf{W})}{\partial \mathbf{W}_{ij}} \right)^2 \right] \neq 0$ . For the definition of  $p$ -locality to conform to our intuitions about biological locality, we would expect the only allowable variables to be the pre- and postsynaptic neurons  $\mathbf{r}_i$  and  $\mathbf{r}_j$ —we will show that including any other variable will violate  $p$ -locality. To see why, suppose  $k \neq i, j$ . Note that we can decompose  $E$  as:

$$E(\mathbf{r}, \mathbf{W}) = E_k + E_{\neq k} \quad (\text{D.6})$$

$$E_k = \left( \frac{1}{2\tau} \mathbf{r}_k^2 - \frac{1}{2} \sum_j \mathbf{W}_{kj} \mathbf{r}_k \mathbf{r}_j - \frac{1}{2} \sum_j \mathbf{W}_{jk} \mathbf{r}_j \mathbf{r}_k \right) / \sigma^2 \quad (\text{D.7})$$

$$E_{\neq k} = \left( \frac{1}{2\tau} \sum_{i \neq k} \mathbf{r}_i^2 - \frac{1}{2} \sum_{ij \neq k} \mathbf{W}_{ij} \mathbf{r}_i \mathbf{r}_j + \frac{1}{2} \sum_{ij} \mathbf{W}_{ij}^2 \right) / \sigma^2. \quad (\text{D.8})$$

Under this decomposition,  $E_k$  has no dependency on  $\mathbf{W}_{ij}$ , and  $E_{\neq k}$  has no dependency on  $\mathbf{r}_k$ . Now we're in a position to demonstrate that for any choice of  $k$  such that  $k \neq i, j$ ,  $f_{\mathbf{W}_{ij}}(\mathbf{r})$  *cannot* be  $p$ -local.

$$p(\mathbf{r}_k | \mathbf{r}_{\neq k}, \mathbf{W}) = \frac{p(\mathbf{r} | \mathbf{W})}{p(\mathbf{r}_{\neq k}, \mathbf{W})} \quad (\text{D.9})$$

$$= \frac{p(\mathbf{r} | \mathbf{W})}{\int p(\mathbf{r}, \mathbf{W}) d\mathbf{r}_k} \quad (\text{D.10})$$

$$= \frac{e^{-E}}{\int e^{-E} d\mathbf{r}_k} \quad (\text{D.11})$$

$$= \frac{e^{-(E_k + E_{\neq k})}}{e^{-E_{\neq k}} \int e^{-(E_k)} d\mathbf{r}_k} \quad (\text{D.12})$$

$$= \frac{e^{-(E_k)}}{\int e^{-(E_k)} d\mathbf{r}_k} \quad (\text{D.13})$$

$$\Rightarrow \frac{\partial}{\partial \mathbf{W}_{ij}} \log p(\mathbf{r}_k | \mathbf{r}_{\neq k}, \mathbf{W}) = 0 \quad (\text{D.14})$$

$$\Rightarrow \mathbb{E}_p \left[ \left( \frac{\partial \log p(\mathbf{r}_k | \mathbf{r}_{\neq k}, \mathbf{W})}{\partial \mathbf{W}_{ij}} \right)^2 \right] = 0. \quad (\text{D.15})$$

Because the conditional distribution has no dependency on  $\mathbf{W}_{ij}$ , then the Fisher Information is also 0, which concludes the demonstration:  $f_{\mathbf{W}_{ij}}$  is not  $p$ -local if it is a function of  $r_k$  for  $k \neq i, j$ . Of course, this decomposition of  $E = E_k + E_{\neq k}$  would not be possible if  $k = i$  or  $j$ . To summarize, for our simple example, any parameter update for  $\mathbf{W}_{ij}$  that depends on the activity of any neuron  $\mathbf{r}_k$  that is not the pre- or postsynaptic neuron ( $k \neq i, j$ ) cannot be  $p$ -local. Alternatively, since this is an undirected graphical model, we can also inspect its corresponding graph (summarized in Figure 1c.). To verify that the graph in Figure 1c. corresponds to our network, observe that our probability

distribution factorizes according the cliques of the graph [42] as follows:

$$p(\mathbf{r}, \mathbf{W}) = \frac{1}{\mathcal{Z}} \prod_i \phi(\mathbf{r}_i) \prod_{ij} \phi(\mathbf{W}_{ij}) \prod_{ij} \phi(\mathbf{r}_i, \mathbf{r}_j, \mathbf{W}_{ij}) \quad (\text{D.16})$$

$$\phi(\mathbf{r}_i) = \exp\left(-\frac{1}{2\tau\sigma^2}\mathbf{r}_i^2\right) \quad (\text{D.17})$$

$$\phi(\mathbf{W}_{ij}) = \exp\left(-\frac{1}{2\sigma^2}\mathbf{W}_{ij}^2\right) \quad (\text{D.18})$$

$$\phi(\mathbf{r}_i, \mathbf{r}_j, \mathbf{W}_{ij}) = \exp\left(-\frac{1}{2\sigma^2}\mathbf{W}_{ij}\mathbf{r}_i\mathbf{r}_j\right). \quad (\text{D.19})$$

Looking at the graph, we can verify by inspection that the only neighbors of  $\mathbf{W}_{ij}$  are  $\mathbf{r}_i$  and  $\mathbf{r}_j$ , which confirms our detailed analysis by Property 2.2.

## E Proofs of $p$ -locality properties of normative plasticity algorithms

### E.1 REINFORCE

**Theorem E.1.** *If  $p(\Theta) = \prod_k p(\Theta_k)$ , the REINFORCE estimator given by  $\mathcal{A}_R(p(R, \mathbf{X}|\Theta))$  is  $Rp$ -local.*

*Proof.* The REINFORCE derivation proceeds as follows: suppose that we have some probabilistic formulation of a neural network and incoming sensory stimuli  $p(\mathbf{X}|\Theta)$  and some probabilistic reward function  $p(R|\mathbf{X})$  dependent on the stimuli and neural responses. We want to maximize expected reward:

$$\mathbb{E}[R] = \int Rp(R|\mathbf{X})p(\mathbf{X}|\Theta)d\mathbf{X}dR. \quad (\text{E.1})$$

If we want to modify our parameters  $\Theta$  in order to improve performance, we take steps in an approximation of the direction of the gradient of the objective  $\mathbb{E}[R]$ .

$$\frac{\partial}{\partial\Theta}\mathbb{E}[R] = \frac{\partial}{\partial\Theta} \int Rp(R|\mathbf{X})p(\mathbf{X}|\Theta)d\mathbf{X}dR \quad (\text{E.2})$$

$$= \int Rp(R|\mathbf{X})\frac{\partial}{\partial\Theta}p(\mathbf{X}|\Theta)d\mathbf{X}dR \quad (\text{E.3})$$

$$= \int Rp(R|\mathbf{X})\frac{\partial}{\partial\Theta}e^{\log p(\mathbf{X}|\Theta)}d\mathbf{X}dR \quad (\text{E.4})$$

$$= \int Rp(R|\mathbf{X})\left[\frac{\partial}{\partial\Theta}\log p(\mathbf{X}|\Theta)\right]p(\mathbf{X}|\Theta)d\mathbf{X}dR \quad (\text{E.5})$$

$$\approx \frac{1}{K}\sum_{k=1}^K R^{(k)}\frac{\partial}{\partial\Theta}\log p(\mathbf{X}^{(k)}|\Theta), \quad (\text{E.6})$$

where in this last step we have employed a Monte Carlo approximation of the expectation, where  $R^{(k)}$  and  $\mathbf{X}^{(k)} \sim p(R, \mathbf{X})$ . This update function:  $f(R, \mathbf{Z}) = R \times \frac{\partial}{\partial\Theta} \log p(\mathbf{X}|\Theta)$  is not  $p$ -local because we have  $\partial f(R, \mathbf{Z})/\partial R \neq 0$ , while  $\frac{\partial}{\partial\Theta}p(R|\mathbf{X}) = 0$ . However, as we know, this update is the product of a score function with a marginal parameter distribution that we have assumed factorizes, which we know to be  $p$ -local by Property 2.7, with a scalar reward  $R$ . In this case, one could postulate that reward information is projected broadly to many synapses in the neural network via a neuromodulatory pathway (Figure 2a). We see that  $f(R, \mathbf{X}) = h(R, g(\mathbf{X}))$  if we take  $h(a, b) = a \times b$  and  $g(\mathbf{X}) = \frac{\partial}{\partial\Theta} \log p(\mathbf{X}|\Theta)$ ; we further see that  $g$  is  $p$ -local, and hence  $f(R, \mathbf{X})$  is by Definition 2.3  $Rp$ -local.

□



This might seem contrived, because *any* function is  $Sp$ -local for some sufficiently broad choice of  $\mathbf{S}$ . However, we have shown here that the REINFORCE algorithm is  $Rp$ -local for *any* choice of  $p$  with a marginal parameter distribution that factorizes (an easy constraint to satisfy for directed graphical model architectures). This means that we can make any of a huge variety of neural network or probabilistic model choices and still have the REINFORCE algorithm obey the same notion of locality, without having to modify our definition post-hoc.

## E.2 Maximum Likelihood Estimation (MLE)

MLE is a highly popular machine learning method and the fundamental basis for several subsequent normative plasticity algorithms. This algorithm involves fitting a model,  $p_m(\mathbf{X}|\Theta)$ , to an empirical data distribution,  $p_d(\mathbf{X})$ .

**Theorem E.2.** *If  $p(\Theta) = \prod_k p(\Theta_k)$ , the MLE update given by  $\mathcal{A}_{MLE}(p_m(\mathbf{X}|\Theta), p_d(\mathbf{X}))$  is  $p_m$ -local.*

*Proof.* We proceed by first deriving the MLE update function. The objective function for maximum likelihood estimation is given by the KL divergence between an empirical data distribution,  $p_d(\mathbf{X})$  and a probabilistic model of the data  $p_m(\mathbf{X}|\Theta)$ . We have:

$$\text{KL}[p_d(\mathbf{X})||p_m(\mathbf{X}|\Theta)] = - \int \log \left( \frac{p_m(\mathbf{X}|\Theta)}{p_d(\mathbf{X})} \right) p_d(\mathbf{X}) d\mathbf{X}. \quad (\text{E.7})$$

We want to minimize this objective function, which we do by gradient descent:

$$\mathcal{A}_{MLE}(p(\mathbf{X}), p_m(\mathbf{X})) \propto \frac{\partial}{\partial \Theta} \int \log \left( \frac{p_m(\mathbf{X}|\Theta)}{p_d(\mathbf{X})} \right) p_d(\mathbf{X}) d\mathbf{X} \quad (\text{E.8})$$

$$= \int \frac{\partial}{\partial \Theta} \log(p_m(\mathbf{X}|\Theta)) p_d(\mathbf{X}) d\mathbf{X} \quad (\text{E.9})$$

$$\approx \frac{1}{K} \sum_{k=0}^K \frac{\partial}{\partial \Theta} \log(p_m(\mathbf{X}_k|\Theta)), \quad (\text{E.10})$$

where  $\mathbf{X}_k \sim p_d(\mathbf{X})$ , and in the last approximate equality we have used a Monte Carlo sampling integral approximation. This update exclusively contains the score function of  $p_m$ , so by Property 2.7, the update is  $p_m$ -local.  $\square$

## E.3 Generalized EM (GEM)

MLE estimation runs into difficulties when attempting to fit latent variable models, (e.g. when  $p_m(\mathbf{X}_o) = \int p_m(\mathbf{X}_o, \mathbf{X}_h) d\mathbf{X}_h$ ), where  $\mathbf{X}_h$  are latent variables within the model distribution that ‘explain’ observed data  $\mathbf{X}_o$ . Latent variable models are extraordinarily powerful, and appear in computational neuroscience in a variety of forms, including but not limited to factor analysis, hidden Markov models, and Kalman Filters [43]; for these models, we will take  $\mathbf{X} = [\mathbf{X}_o, \mathbf{X}_h]$ . Instead of performing explicit MLE, when fitting latent variable models one usually resorts to some variant of the Expectation-Maximization (EM) algorithm [44]. Here, we show that a particular variant of the EM algorithm, called Generalized EM (GEM) [45], is  $p_m$ -local in the same way as MLE.

GEM gains computational benefits by substituting (by any of a variety of methods) an approximate posterior distribution  $p_d(\mathbf{X}_h|\mathbf{X}_o)$  for the true, but typically intractable, model posterior  $p_m(\mathbf{X}_h|\mathbf{X}_o)$  via minimizing a variational free energy [45]. However, GEM is not just a convenient model-fitting algorithm: in subsequent sections, we will show that the  $p_m$ -locality of GEM explains why several popular normative plasticity algorithms produce biologically plausible updates.

**Theorem E.3.** *If  $p(\Theta) = \prod_k p(\Theta_k)$ , the GEM update given by  $\mathcal{A}_{GEM}(p_m(\mathbf{X}|\Theta), p_d(\mathbf{X}))$  is  $p_m$ -local.*

*Proof.* Rather than minimize  $\text{KL}[p_d(\mathbf{X}_o)||p_m(\mathbf{X}_o|\Theta)]$ , the GEM algorithm minimizes an upper bound (the variational free energy). Taking  $\mathbf{X} = [\mathbf{X}_o, \mathbf{X}_h]$ :

$$\begin{aligned} \text{KL}[p_d(\mathbf{X}_o)||p_m(\mathbf{X}_o|\Theta)] &\geq \text{KL}[p_d(\mathbf{X}_o)||p_m(\mathbf{X}_o|\Theta)] + \mathbb{E}_{p_d(\mathbf{X}_o)} [\text{KL}[p_d(\mathbf{X}_h|\mathbf{X}_o)||p_m(\mathbf{X}_h|\mathbf{X}_o, \Theta)]] \\ &= \text{KL}[p_d(\mathbf{X})||p_m(\mathbf{X}|\Theta)], \end{aligned} \quad (\text{E.11})$$

where the inequality follows from the positivity of the KL divergence. Here,  $p_d(\mathbf{X}_h|\mathbf{X})$  is an *approximate inference* distribution. Different choices of how this distribution is selected/optimized can produce very different learning algorithms, with varying degrees of biological plausibility. Obviously, the loss is minimized with respect to  $p_d(\mathbf{X}_h|\mathbf{X})$  if  $p_d(\mathbf{X}_h|\mathbf{X}) = p_m(\mathbf{X}_h|\mathbf{X}, \Theta_0)$  (where  $\Theta_0 = \Theta$  prior to optimization wrt  $\Theta$ ). This choice corresponds to GEM [45]. For now, we will not concern ourselves with how  $p_d(\mathbf{X}_h|\mathbf{X})$  is selected—instead, we will focus on the locality properties of gradient updates of this loss with respect to  $\Theta_m$ .

Having packaged hidden and observed variables together ( $\mathbf{X} = [\mathbf{X}_o, \mathbf{X}_h]$ ), our derivation proceeds exactly the same as for MLE:

$$\begin{aligned} \mathcal{A}_{GEM}(p_m(\mathbf{X}|\Theta), p_d(\mathbf{X})) &\propto -\frac{\partial}{\partial\Theta} \text{KL}[p_d(\mathbf{X})||p_m(\mathbf{X}|\Theta)] \\ &= \frac{\partial}{\partial\Theta} \int \log\left(\frac{p_m(\mathbf{X}|\Theta)}{p_d(\mathbf{X})}\right) p_d(\mathbf{X}) d\mathbf{X} \\ &= \int \frac{\partial}{\partial\Theta} \log(p_m(\mathbf{X}|\Theta)) p_d(\mathbf{X}) d\mathbf{X} \\ &\approx \frac{1}{K} \sum_{k=0}^K \frac{\partial}{\partial\Theta} \log(p_m(\mathbf{X}_h, \mathbf{X}|\Theta)), \end{aligned} \quad (\text{E.12})$$

where as with the MLE update,  $\mathbf{X}_k \sim p_m(\mathbf{X}|\Theta)$ . This update is  $p_m$ -local for the same reason that the MLE update is.  $\square$

#### E.4 Predictive Coding (PC)

As an additional note, if one takes the approximate posterior  $p_d(\mathbf{X}_h|\mathbf{X}_o)$  to be given by:

$$p_d(\mathbf{X}_h|\mathbf{X}_o) = \underset{p_d(\mathbf{X}_h|\mathbf{X}_o)}{\text{argmin}} \text{KL}[p_d(\mathbf{X})||p_m(\mathbf{X}|\Theta)] \text{ s.t. } p_d(\mathbf{X}_h|\mathbf{X}_o) \sim \delta(\bar{\mathbf{X}}_h(\mathbf{X}_o)), \quad (\text{E.13})$$

where  $\delta(\cdot)$  indicates a Dirac delta distribution and  $\bar{\mathbf{X}}_h(\mathbf{X}_o)$  indicates a set of observation-dependent mean parameters, then we recover the predictive coding family of algorithms [35]. Typically, in this context for a given observed stimulus  $\mathbf{X}_o$ ,  $p_d(\mathbf{X}_h|\mathbf{X}_o) \sim \delta(\bar{\mathbf{X}}_h(\mathbf{X}_o))$  is estimated by reparameterization and gradient descent with respect to  $\bar{\mathbf{X}}_h(\mathbf{X}_o)$  (a mean parameter that is observation-dependent), which—for clever choices of  $p_m$ —loosely resembles the dynamics of a recurrent neural network relaxing to a stimulus-conditioned equilibrium state [33]. After estimating  $\bar{\mathbf{X}}_h(\mathbf{X}_o)$ , parameters  $\Theta$  are updated as in GEM. Therefore, the derivation above also applies to predictive coding algorithms, which are consequently also  $p_m$ -local.

**Theorem E.4.** *If  $p(\Theta) = \prod_k p(\Theta_k)$ , the PC update given by  $\mathcal{A}_{PC}(p_m(\mathbf{X}|\Theta), p_d(\mathbf{X}))$  is  $p_m$ -local.*

#### E.5 Wake-Sleep

Unlike the previous three examples, which only require sampling from the  $p_d$  distribution and only calculate parameter updates according to the  $p_m$  distribution, the Wake-Sleep algorithm parameterizes both distributions and jointly samples from a mixture of the two distributions across its ‘wake’ and ‘sleep’ phases. As we will see, this will mean that the Wake-Sleep algorithm will end up being  $\gamma p_{md}$ -local, where  $\gamma$  is the binary variable that controls whether the system is in its ‘wake’ or ‘sleep’ phase.

**Theorem E.5.** *If  $p(\Theta, \Theta^{(d)}) = (\prod_k p(\Theta_k)) (\prod_k p(\Theta_k^{(d)}))$ , the Wake-Sleep estimator given by  $\mathcal{A}_{WS}(p_m(\mathbf{X}|\Theta), p_d(\mathbf{X}|\Theta^{(d)}))$  is  $\gamma p_{md}$ -local, where  $p_{md} = \text{Mix}(p_m(\mathbf{X}|\Theta), p_d(\mathbf{X}|\Theta^{(d)})) p(\Theta, \Theta^{(d)})$ .*

*Proof.* Our updates use a similar loss to the GEM algorithm, namely we take:

$$\mathcal{A}_{WS}(p_m(\mathbf{X}|\Theta), p_d(\mathbf{X}|\Theta^{(d)})) = \left[ \Delta\Theta_{WS}, \Delta\Theta_{WS}^{(d)} \right], \quad (\text{E.14})$$

where  $\Delta\Theta_{WS}$  is given by:

$$\begin{aligned}\Delta\Theta_{WS} &\propto -\frac{\partial}{\partial\Theta}\text{KL}[p_d(\mathbf{X}|\Theta^{(d)})||p_m(\mathbf{X}|\Theta)] \\ &\approx \frac{2}{K}\sum_{k=0}^K\gamma_k\frac{\partial}{\partial\Theta}\log(p_m(\mathbf{X}_k,\mathbf{X}|\Theta)).\end{aligned}\quad (\text{E.15})$$

Here,  $\gamma_k, \mathbf{X} \sim p_{md}(\mathbf{X}, \gamma|\Theta, \Theta^{(d)})$ , whereas for GEM, we sampled only from  $p_d$ . Because each term of this update is 0 if  $\gamma_k \neq 1$ , this update is still an unbiased estimate of the gradient [46] and is effectively equivalent to the GEM update, except that it allows the system to alternate between sampling from  $p_m$  and  $p_d$ . This alternation is useful because it will allow also calculating parameter updates for  $\Delta\Theta^{(d)}$ . For  $\Theta^{(d)}$ , we optimize the *reverse* KL-divergence<sup>4</sup>; by a directly analogous derivation to Eq. E.12, the update is given by:

$$\begin{aligned}\Delta\Theta_{WS}^{(d)} &\propto -\frac{\partial}{\partial\Theta^{(d)}}\text{KL}[p_m(\mathbf{X}|\Theta)||p_d(\mathbf{X}|\Theta^{(d)})] \\ &\approx \frac{2}{K}\sum_{k=0}^K(1-\gamma_k)\frac{\partial}{\partial\Theta^{(d)}}\log(p_d(\mathbf{X}|\Theta^{(d)})).\end{aligned}\quad (\text{E.16})$$

Now, these updates contain the score function for both  $p_m$  and  $p_d$ , as well as the scalar mixture variable  $\gamma$ . As a consequence, both updates are  $\gamma p_{md}$ -local, via Properties 2.7 and 2.8 (slightly more precisely,  $\Delta\Theta$  is  $\gamma p_m$ -local, and  $\Delta\Theta^{(d)}$  is  $\gamma p_d$ -local).  $\square$

## E.6 Impression Learning (IL)

The impression learning parameter update [23] is closely related to the Wake-Sleep parameter update, and is consequently also  $\gamma p_{md}$ -local. What distinguishes IL from WS is the use of rapid alternations in the gating signal  $\gamma_t$  within a single trial with  $T$  time steps. Here,  $\mathbf{X} = [\mathbf{X}_0, \dots, \mathbf{X}_T]$ ,  $\gamma = [\gamma_0, \dots, \gamma_T]$  and  $p_{md}(\mathbf{X}|\gamma, \Theta) = \prod_{t=0}^T p_d(\mathbf{X}_t|\mathbf{X}_{t-1}, \Theta)^{\gamma_t} p_m(\mathbf{X}_t|\mathbf{X}_{t-1}, \Theta)^{1-\gamma_t}$  is a mixture distribution in which  $\gamma_t$  alternates between 0 and 1, sampling from either  $p_m$  or  $p_d$  at the time step  $t$ , respectively.

**Theorem E.6.** *If  $p(\Theta) = \prod_k p(\Theta_k)$ , the impression learning estimator given by  $A_{IL}(p_m(\mathbf{X}|\Theta), p_d(\mathbf{X}|\Theta))$  is  $\gamma p_{md}$ -local, where  $p_{md} = \text{Mix}(p_m(\mathbf{X}|\Theta), p_d(\mathbf{X}|\Theta^{(d)})) p(\Theta)$ .*

*Proof.* Similar to WS, the update is given by:

$$\Delta\Theta_{IL} \propto \int \left[ \sum_{t=0}^T \frac{\partial}{\partial\Theta} [(1-\gamma_t)\log p_d(\mathbf{X}_t|\mathbf{X}_{t-1}, \Theta) + \gamma_t \log p_m(\mathbf{X}_t|\mathbf{X}_{t-1}, \Theta)] \right] p_{md}(\mathbf{X}|\gamma, \Theta) d\mathbf{X} \quad (\text{E.17})$$

$$\approx \sum_{t=0}^T (1-\gamma_t) \frac{\partial}{\partial\Theta} \log p_d(\mathbf{X}_t|\mathbf{X}_{t-1}, \Theta) + \gamma_t \frac{\partial}{\partial\Theta} \log p_m(\mathbf{X}_t|\mathbf{X}_{t-1}, \Theta), \quad (\text{E.18})$$

where in this last equality,  $\mathbf{X} \sim p_{md}(\mathbf{X})$ , and we are performing a single-sample gradient approximation. It is worth noting that unlike in the Wake-Sleep algorithm, here  $\gamma_t$  is not a constant throughout time. Instead,  $\gamma_t$  alternates between 0 and 1 with ‘phase duration’  $K$ , i.e.  $\gamma_{t+1} = 1 - \gamma_t$  if  $\text{mod}(t, K) = 0$ , and  $\gamma_{t+1} = \gamma_t$  otherwise. The IL update is the score function of  $p_{md}(\mathbf{X}|1-\gamma, \Theta)$ , which has identical dependencies to the score function of  $p_{md}(\mathbf{X}|\gamma, \Theta)$  (only a change from  $\gamma \rightarrow 1-\gamma$  has occurred). Therefore, if  $p(\Theta) = \prod_k p(\Theta_k)$ , this parameter update is  $\gamma p_{md}$ -local by Property 2.7.  $\square$

<sup>4</sup>A rigorous discussion of why this optimization process is sensible is beyond the scope of this manuscript. See [22, 47] for more detail.

## E.7 Contrastive Divergence for Boltzmann machines (CD)

While the GEM learning update is provably  $p_m$ -local, it is also predicated on the assumption that the parameter marginal distribution factorizes as  $p(\Theta) = \prod_k p(\Theta_k)$ , which as we note in Appendix D can be difficult to ensure for even simple undirected graphical models. An extension of the GEM algorithm, we can show that the CD algorithm is  $\gamma p_{md}$ -local (as opposed to just  $p_m$ -local) under less restrictive assumptions. The cost of this is that CD learning usually requires costly MCMC sampling from both the posterior distribution  $p_m(\mathbf{X}_h|\mathbf{X}_o, \Theta)$  and the full joint distribution  $p_m(\mathbf{X}_h, \mathbf{X}_o|\Theta)$ .

**Theorem E.7.** *The CD update given by  $\mathcal{A}_{CD}(p_m(\mathbf{X}|\Theta), p_d(\mathbf{X}))$  is  $\gamma p_{md}$ -local, where  $p_{md} = \text{Mix}(p_m(\mathbf{X}|\Theta), p_d(\mathbf{X}))p(\Theta)$ .*

As mentioned above, for GEM the most natural choice for  $p_d(\mathbf{X}_h|\mathbf{X})$  is given by  $p_m(\mathbf{X}_h|\mathbf{X}, \Theta_0)$ . As we demonstrated, parameter updates calculated according to this rule will be  $\gamma p_{md}$ -local, but there are two important caveats. First, for GEM to produce biologically plausible updates, we still need a biological system that can sample from  $p_m(\mathbf{X}_h|\mathbf{X}, \Theta_0)$ . Second, it is important to remember that we are only guaranteed that the score function is guaranteed to be  $p$ -local if the marginal parameter probability distribution factorizes as  $p(\Theta) = \prod_k p(\Theta_k)$ . For a DAG, it may be difficult to satisfy the first condition without approximation (given by the Wake-Sleep algorithm, for instance), whereas for an UG, it may be difficult to satisfy the second condition, as we saw in Section D. To make our update  $\gamma p_{md}$ -local for an undirected graphical model like the Boltzmann machine, we will require an extra step that we outline here to use the energy function Property 2.6 rather than the score function Property 2.7.

Having committed to working with an undirected graphical model, instead of sticking to the original GEM update, here we break apart the probability distribution as:

$$\mathcal{A}_{CD}(p_m(\mathbf{X}|\Theta), p_d(\mathbf{X})) = \int \frac{\partial}{\partial \Theta} \log(p_m(\mathbf{X}|\Theta)) p_d(\mathbf{X}) d\mathbf{X} \quad (\text{E.19})$$

$$= \int \frac{\partial}{\partial \Theta} [\log(E(\mathbf{X}, \Theta)) - \log \mathcal{Z}(\Theta)] p_d(\mathbf{X}) d\mathbf{X} \quad (\text{E.20})$$

$$= - \int \frac{\partial}{\partial \Theta} E(\mathbf{X}, \Theta) p_d(\mathbf{X}) d\mathbf{X} - \frac{\partial}{\partial \Theta} \log \mathcal{Z}(\Theta) \quad (\text{E.21})$$

$$= - \int \frac{\partial}{\partial \Theta} E(\mathbf{X}, \Theta) p_d(\mathbf{X}) d\mathbf{X} - \frac{1}{\mathcal{Z}(\Theta)} \int \frac{\partial}{\partial \Theta} e^{-\frac{E(\mathbf{X}, \Theta)}{\sigma^2}} d\mathbf{X} \quad (\text{E.22})$$

$$= - \int \frac{\partial}{\partial \Theta} E(\mathbf{X}, \Theta) p_d(\mathbf{X}) d\mathbf{X} + \frac{1}{\mathcal{Z}(\Theta)} \int \frac{\partial}{\partial \Theta} E(\mathbf{X}, \Theta) e^{-E(\mathbf{X}, \Theta)} d\mathbf{X} \quad (\text{E.23})$$

$$= - \int \frac{\partial}{\partial \Theta} E(\mathbf{X}, \Theta) p_d(\mathbf{X}) d\mathbf{X} + \int \frac{\partial}{\partial \Theta} E(\mathbf{X}, \Theta) p_m(\mathbf{X}|\Theta) d\mathbf{X} \quad (\text{E.24})$$

$$\approx \frac{2}{K} \sum_{k=0}^K (-1)^{\gamma_k} \frac{\partial}{\partial \Theta} E(\mathbf{X}_k, \Theta), \quad (\text{E.25})$$

where  $\mathbf{X}_k$  is sampled from  $p_{md}$ . Now, by Property 2.6 and Property 2.8, this update is  $\gamma p_{md}$ -local. This is the Boltzmann machine learning algorithm [26], where the clamped and unclamped phases are alternated between stochastically [46]; for our previous linear Boltzmann example, in which  $\mathbf{X} = \mathbf{r}$  and  $\Theta = \mathbf{W}$ , the derivative of the energy function (Eq. D.3) with respect to a parameter  $\mathbf{W}_{ij}$  is  $\mathbf{r}_i \mathbf{r}_j$ , demonstrating that updates correspond to two phases of updates: one in which  $\mathbf{r}_o$  is clamped to a data distribution given by  $p_d(\mathbf{r}_o)$  for some  $\mathbf{r}_o \subseteq \mathbf{r}$  and Hebbian updates are positive, contrasted with an unclamped phase in which updates are negative. Note that for this model approximate sampling from a posterior distribution  $p_m(\mathbf{r}_{\neq o}|\mathbf{r}_o, \mathbf{W})p_d(\mathbf{r}_o)$  is no more difficult than sampling from the joint distribution: one simply holds  $\mathbf{r}_o$  fixed to an environmental data sample and performs Langevin sampling on all other variables.

## E.8 Equilibrium Propagation (EP)

Though the derivation and setup of the equilibrium propagation algorithm [27] is very different from Contrastive Divergence, the functional form of the derived update is very similar. While equilibrium propagation typically operates on deterministic networks, here we will provide our derivation for the stochastic version with an energy function defining a joint distribution over  $\Theta$  and  $\mathbf{X}$  (as in Section D), which is somewhat more straightforward to fit into the  $p$ -locality framework.

Suppose that we have a probabilistic energy-based model whose energy function is given by:

$$E(\mathbf{Z}, \epsilon) = E_0(\mathbf{Z}) + \epsilon \mathcal{L}(\mathbf{Z}), \quad (\text{E.26})$$

where  $\epsilon \in \{0, \beta\}$ , where  $\beta \ll 1$ , where  $\mathcal{L}(\mathbf{Z})$  is the loss function that the parameter updates are optimizing. This can be thought of as a ‘soft-clamped’ system, in which nonzero  $\epsilon$  pushes the system towards slightly better performance. Intuitively, the EP parameter update attempts to change network dynamics so that the unclamped system is nudged towards the slightly better performing soft-clamped system. Then we have the following theorem:

**Theorem E.8.** *The EP update given by  $\mathcal{A}_{EP}(p(\mathbf{X}|\Theta, \gamma))$  is  $\gamma p_{md}$ -local, where  $p_{md} = \text{Mix}(p(\mathbf{X}|\Theta, \epsilon = \beta), p(\mathbf{X}|\Theta, \epsilon = 0))p(\Theta)$ .*

The parameter update for equilibrium propagation is given by:

$$\Delta \Theta_{EP} \propto -\frac{1}{\beta} \left[ \mathbb{E}_{\epsilon=\beta} \frac{\partial E(\mathbf{Z}, \epsilon)}{\partial \Theta} - \mathbb{E}_{\epsilon=0} \frac{\partial E(\mathbf{Z}, \epsilon)}{\partial \Theta} \right] \quad (\text{E.27})$$

$$\approx \frac{2}{\beta} \sum_{k=0}^K (-1)^{\epsilon_k/\beta} \frac{\partial E(\mathbf{Z}_k, \epsilon_k)}{\partial \Theta}, \quad (\text{E.28})$$

where for the final equality we are using a sampling-based approximation in which we are sampling from  $\mathbf{X}_k \sim p(\mathbf{X}|\Theta, \epsilon_k)$ , and  $\epsilon_k/\beta \sim \text{Bernoulli}(0.5)$ . This is almost identical to the Contrastive Divergence update, except that rather than clamping neural activities to a target output, they are slightly biased towards better performance. Because this is the combination of the derivative of the energy function with a mixture variable  $\gamma = \epsilon_k/\beta$ , by Properties 2.6 and 2.8, this update is  $\gamma p_{md}$ -local where  $p_{md} = \text{Mix}(p(\mathbf{X}|\Theta, \epsilon = \beta), p(\mathbf{X}|\Theta, \epsilon = 0))p(\Theta)$ .

## E.9 Winner-take-all STDP

While Contrastive Divergence uses MCMC sampling to approximate the GEM update, Nessler et al. [48] use a particular generative model for which the posterior can be analytically calculated and resembles a simple winner-take-all neural circuit. Then, the authors derive their STDP parameter update as an approximation to the GEM algorithm. Because of this, one might imagine that the derived STDP update may, like the GEM algorithm, be  $p_m$ -local. We will see below that this is the case.

First, we define the generative model  $p_m$  used in the paper:

$$p_m(\mathbf{r}, \mathbf{s}|\mathbf{W}) = \frac{1}{\mathcal{Z}} e^{-E(\mathbf{r}, \mathbf{s}, \mathbf{W})} \quad (\text{E.29})$$

$$E(\mathbf{r}, \mathbf{s}, \mathbf{W}) = - \left( \sum_{i=0}^N \mathbf{r}_i \mathbf{W}_{i0} + \sum_{i=0}^N \sum_{j=0}^{N_s} \mathbf{r}_i \mathbf{W}_{ij} \mathbf{s}_j \right), \quad (\text{E.30})$$

where  $\mathcal{Z}$  is the normalizing constant and the  $\mathbf{r}$  and  $\mathbf{s}$  vectors contain binary random variables. Furthermore, in the network only one neuron  $\mathbf{r}$  is assumed to fire at any given time ( $\mathbf{r}_i \neq 0 \Leftrightarrow \mathbf{r}_k = 0 \forall k \neq i$ ). The inference distribution, conditioned on a stimulus  $\mathbf{s}$  can be calculated as follows:

$$p_m(\mathbf{r}|\mathbf{s}, \mathbf{W}) = \frac{\exp \left( \sum_{i=0}^N \mathbf{r}_i \mathbf{W}_{i0} + \sum_{i=0}^N \sum_{j=0}^{N_s} \mathbf{r}_i \mathbf{W}_{ij} \mathbf{s}_j \right)}{\sum_{i=0}^N \exp \left( \mathbf{W}_{i0} + \sum_{j=0}^{N_s} \mathbf{W}_{ij} \mathbf{s}_j \right)}. \quad (\text{E.31})$$

This probability distribution can be interpreted as a kind of winner-take-all computation, dominated by the neuron with the greatest input current [48]. Samples from this distribution are used to compute the weight updates:

$$\Delta \mathbf{W}_{ij} \propto \mathbf{r}_i (c s_i e^{-\mathbf{W}_{ij}} - 1) \quad (\text{E.32})$$

$$\Delta \mathbf{W}_{i0} \propto \mathbf{r}_i e^{-\mathbf{W}_{i0}} - 1, \quad (\text{E.33})$$

where  $c$  is a positive constant. We now prove the following theorem assessing the  $p$ -locality of this distribution:

**Theorem E.9.** *The STDP update given by  $\mathcal{A}_{STDP}(p(\mathbf{X}|\Theta))$  is  $\gamma p_m$ -local.*

*Proof.* To see this, we first note that the gradient of the energy function  $E(\mathbf{r}, \mathbf{s}, \mathbf{W})$  with respect to the parameters is  $p_m$ -local by Property 2.6. Therefore, any variables contained within this will also be permissible under  $p_m$ -locality.

For  $\mathbf{W}_{ij}$ , we have:

$$\frac{\partial E(\mathbf{r}, \mathbf{s}, \mathbf{W})}{\partial \mathbf{W}_{ij}} = -\mathbf{r}_i \mathbf{s}_j, \quad (\text{E.34})$$

so that we know  $\mathbf{r}_i$  and  $\mathbf{s}_j$  are permissible for  $\Delta \mathbf{W}_{ij}$  under  $p_m$ -locality; further, the value of a parameter itself,  $\mathbf{W}_{ij}$ , is always allowed under  $p_m$ -locality. These are the only variables on which  $\Delta \mathbf{W}_{ij}$  depends, so this update is  $p_m$ -local.

For  $\mathbf{W}_{i0}$ , we have:

$$\frac{\partial E(\mathbf{r}, \mathbf{s}, \mathbf{W})}{\partial \mathbf{W}_{i0}} = -\mathbf{r}_i, \quad (\text{E.35})$$

so that we know  $\mathbf{r}_i$  is permissible for  $\Delta \mathbf{W}_{i0}$ . By the same reasoning, this update is also  $p_m$ -local. Since all updates are therefore  $p_m$ -local, we may conclude that the full algorithm is  $p_m$ -local. However, this proof does not have the same level of generality as for the previous algorithms, because the algorithm is only defined for a single winner-take-all network model.  $\square$

## E.10 Backpropagation

**Theorem E.10.** *If  $p(\Theta) = \prod_k p(\Theta_k)$  and  $p(\mathbf{X}|\Theta)$  is defined by Eq. 3 (with  $\mathbf{X} = \mathbf{r}$  and  $\Theta = \mathbf{W}$ ), the BP update for  $\mathbf{W}_{ij}^{(l)}$  with a loss  $\mathcal{L}(\mathbf{r})$ , given by  $\mathcal{A}_{BP}(p(\mathbf{r}|\mathbf{W}), \mathcal{L}(\mathbf{r}))$  is  $\mathbf{e}_i^{(l)}$ - $p$ -local, where  $\mathbf{e}_i^{(l)} = \frac{d\mathcal{L}}{d\mathbf{r}_i}$ . Similarly, the updates for feedback alignment, weight mirror, and Burstprop are  $\hat{\mathbf{e}}_i^{(l)}$ - $p$ -local, where  $\hat{\mathbf{e}}_i^{(l)}$  is given by their respective gradient approximations.*

*Proof.* As a first step, for clarity purposes we will demonstrate that backpropagation [28], is *not*  $p$ -local with respect to the simple feedforward neural network architecture we outlined above; we will subsequently demonstrate that it and its approximations do satisfy a particular notion of  $\mathcal{S}p$ -locality. For a scalar loss function  $\mathcal{L}(\mathbf{r}^L)$  and a single parameter  $\mathbf{W}_{ij}^{(l)}$ , the backpropagation gradient is given by the negative gradient of the loss with respect to the parameter of choice, using the reparameterization trick [25, 24] to take for a single sample of  $\{\mathbf{r}^{(l)}\}_{l=0:L}$  the mean (noiseless) mapping from  $\mathbf{r}^{(l-1)} \rightarrow \mathbf{r}^{(l)}$  to be  $\bar{\mathbf{r}}^{(l)} = h(\mathbf{W}^{(l)} \mathbf{r}^{(l-1)})$ , so that by Eq. 5, we have  $\mathbf{r}^{(l)} = \bar{\mathbf{r}}^{(l)} + \sigma \boldsymbol{\eta}^{(l)}$ . By the chain rule, gradient descent gives:

$$\Delta \mathbf{W}_{ij}^{(l)} \propto -\frac{d\mathcal{L}(\mathbf{r}^{(L)})}{d\bar{\mathbf{r}}^{(L)}} \left( \prod_{k=l}^L \frac{d\bar{\mathbf{r}}^{(k)}(\mathbf{r}^{(k-1)})}{d\bar{\mathbf{r}}^{(k-1)}} \right) \frac{d\bar{\mathbf{r}}^{(l)}(\mathbf{W}_{ij}^{(l)})}{d\mathbf{W}_{ij}^{(l)}}. \quad (\text{E.36})$$

Based on our analysis in Section 2.4, this update function is clearly not  $p$ -local, because the update depends on firing rates  $\mathbf{r}^{(k)}$  for  $k > l$ . However, while backpropagation is not in general  $p$ -local, any algorithm can be  $\mathcal{S}p$ -local: for example, if we take  $\mathbf{S} = \mathbf{Z}$ , then by Definition 2.3, any parameter update can contain any variable in the graphical model  $p(\mathbf{Z})$ . Taking  $\mathbf{S} = \mathbf{Z}$  is inherently vacuous:  $\mathcal{S}p$ -locality is only conceptually useful if we can cleanly reduce the number of variables included in  $\mathbf{S}$  for a broad set of biologically relevant neural architectures. Fortunately, for backpropagation

operating on a feedforward neural network governed by Equation 5, we do not need to include every variable in the network. By Equation E.36, we see for our example feedforward neural network that:

$$\Delta \mathbf{W}_{ij}^{(l)} \propto -\frac{d\mathcal{L}}{d\bar{\mathbf{r}}_i^{(l)}} \frac{d\bar{\mathbf{r}}_i^{(l)}}{d\mathbf{W}_{ij}^{(l)}}, \quad (\text{E.37})$$

where  $\frac{d\mathcal{L}}{d\bar{\mathbf{r}}_i^{(l)}} = \frac{d\mathcal{L}(\mathbf{r}^{(L)})}{d\bar{\mathbf{r}}^{(L)}} \left( \prod_{k=l+2}^L \frac{d\bar{\mathbf{r}}^{(k)}(\mathbf{r}^{(k-1)})}{d\bar{\mathbf{r}}^{(k-1)}} \right) \frac{d\bar{\mathbf{r}}^{(l+1)}(\mathbf{r}^{(l)})}{d\bar{\mathbf{r}}_i^{(l)}}$  is the derivative of the global loss function with respect to the individual mean neuron activation  $\bar{\mathbf{r}}_i^{(l)}$ . Interestingly,  $\frac{d\bar{\mathbf{r}}_i^{(l)}}{d\mathbf{W}_{ij}^{(l)}}$ —the derivative of the mean parameter for neuron  $\mathbf{r}_i$ —is a function of only the parents of  $\mathbf{r}^{(l)}$ , which are therefore the *coparents* of  $\mathbf{W}_{ij}^{(l)}$ . To verify that this particular component of the weight update is  $p$ -local, we can compare its dependencies to the score function, which is in this case  $p$ -local by Property 2.7. As noted in Section 2.4, the score function is given by:

$$\frac{\partial \log p(\mathbf{r}|\mathbf{s}, \mathbf{W})}{\partial \mathbf{W}_{ij}^{(l)}} = \frac{(\mathbf{r}_i^{(l)} - h(\mathbf{V}_i^{(l)}))}{\sigma^2} h'(\mathbf{V}_i^{(l)}) \mathbf{r}_j^{(l-1)}, \quad (\text{E.38})$$

where  $\mathbf{V}_i^{(l)} = \mathbf{W}_{i:}^{(l)} \mathbf{r}^{(l-1)}$ . Because the score function is  $p$ -local, any variables that it depends on are permissible for  $p$ -local updates. The score function depends on  $\mathbf{r}_i^{(l)}$  and  $\mathbf{r}^{(l-1)}$ , whereas  $\frac{d\bar{\mathbf{r}}_i^{(l)}}{d\mathbf{W}_{ij}^{(l)}}$  depends only on  $\mathbf{r}^{(l-1)}$ . It follows that this function is also  $p$ -local.

As we already discussed,  $\frac{d\mathcal{L}}{d\bar{\mathbf{r}}_i^{(l)}}$  is not  $p$ -local because it depends on neurons downstream of  $\mathbf{r}_i^{(l)}$ . However, if we define an auxiliary random variable  $\mathbf{e}_i^{(l)} = \frac{d\mathcal{L}}{d\bar{\mathbf{r}}_i^{(l)}}$ , we see that because it multiplies  $\mathbf{e}_i^{(l)}$  with a  $p$ -local function,  $\mathbf{W}_{ij}^{(l)}$  is  $\mathbf{e}_i^{(l)}$   $p$ -local.

Importantly, this does not mean that backpropagation is biologically plausible: this notion of locality provides no clues as to how  $\mathbf{e}_i^{(l)}$  could be calculated or approximated in the brain, and an explicit calculation of gradients could not be possible due to the weight transport problem [20]. There are many recent models that account for how  $\mathbf{e}_i^{(l)}$  could be approximated by an approximate credit assignment signal  $\hat{\mathbf{e}}_i^{(l)}$  involving either random feedback synapses that project errors backwards through the network (feedback alignment [29]) or feedback synapses that dynamically adjust through local synaptic mechanisms so that  $\hat{\mathbf{e}}_i^{(l)}$  provides an unbiased approximation (e.g. weight mirror or Kolen-Pollack alignment [30], and BurstProp [31]). Each of these algorithms decomposes into a nonlocal feedback term  $\hat{\mathbf{e}}_i^{(l)}$  and a  $p$ -local term in exactly the same way, and are consequently  $\hat{\mathbf{e}}_i^{(l)}$   $p$ -local.  $\square$

## E.11 Real Time Recurrent Learning (RTRL)

Consider an autonomous recurrent neural network whose directed acyclic graphical model is provided by the following equations (we will ignore stimulus-dependence for notational simplicity):

$$p(\mathbf{r}|\mathbf{W}) = p(\mathbf{r}(0)) \prod_{t=1}^T \prod_{i=1}^N p(\mathbf{r}_i(t)|\mathbf{r}(t-1), \mathbf{W}) \quad (\text{E.39})$$

$$p(\mathbf{r}_i(t)|\mathbf{r}_i(t-1), \mathbf{W}) \sim \mathcal{N}(h(\mathbf{W}_{i:} \mathbf{r}(t-1)), \sigma^2), \quad (\text{E.40})$$

where  $p(\mathbf{r}(0))$  corresponds to some initial distribution of activity states. This probability distribution of firing rates corresponds to the following neural sampling dynamics:

$$\mathbf{r}(t) = h(\mathbf{W}\mathbf{r}(t-1)) + \sigma \boldsymbol{\eta}, \quad (\text{E.41})$$

where  $\boldsymbol{\eta} \sim \mathcal{N}(0, 1)$ . For this model, we have the following theorem:

**Theorem E.11.** *If  $p(\boldsymbol{\Theta}) = \prod_k p(\boldsymbol{\Theta}_k)$  and  $p(\mathbf{X}|\boldsymbol{\Theta})$  is defined by Eq. E.39 (with  $\mathbf{X} = \mathbf{r}$  and  $\boldsymbol{\Theta} = \mathbf{W}$ ), the RTRL update for  $\mathbf{W}_{ij}$  with a loss  $\mathcal{L}(\mathbf{r}(T))$ , given by  $\mathcal{A}_{\text{RTRL}}(p(\mathbf{r}|\mathbf{W}), \mathcal{L}(\mathbf{r}))$  is  $\mathbf{e}\mathbf{J}$   $p$ -local, where  $\mathbf{e} = \frac{\partial \mathcal{L}(\mathbf{r}(T))}{\partial \bar{\mathbf{r}}^{(T)}}$ , and  $\mathbf{J} = \{\mathbf{J}(t) = \frac{\partial \bar{\mathbf{r}}(t, \mathbf{r})}{\partial \bar{\mathbf{r}}(t-1, \mathbf{r})}\}$ .*

*Proof.* The directed graphical model corresponding to these dynamics is depicted in Figure 1b: as with backpropagation, we will use the score function for our graphical model to identify permissible variables. For a single synapse, the score function is given by:

$$\frac{\partial \log p(\mathbf{r}|\mathbf{W})}{\partial \mathbf{W}_{ij}} = \sum_{t=1}^T \frac{\partial \log p(\mathbf{r}_i(t)|\mathbf{r}(t-1), \mathbf{W})}{\partial \mathbf{W}_{ij}} \quad (\text{E.42})$$

$$= \sum_{t=1}^T \frac{(\mathbf{r}_i(t) - h(\mathbf{V}_i(t)))}{\sigma^2} h'(\mathbf{V}_i(t)) \mathbf{r}_j(t-1), \quad (\text{E.43})$$

where  $\mathbf{V}_i(t) = \mathbf{W}_i \mathbf{r}(t-1)$ . Thus  $p$ -local parameter updates for  $\mathbf{W}_{ij}$  may include  $\mathbf{W}_i$ ,  $\mathbf{r}_i(t)$  and  $\{\mathbf{r}_k(t-1) : \mathbf{W}_{ik} \neq 0\} \forall t$ . We will now compare these allowed variables to the RTRL update. As with backpropagation, we take  $\bar{\mathbf{r}}(t, \mathbf{r}) = h(\mathbf{W} \mathbf{r}(t-1))$ , so that  $\mathbf{r}(t) = \bar{\mathbf{r}}(t, \mathbf{r}) + \sigma \boldsymbol{\eta}$ . The RTRL update minimizes a loss  $\mathcal{L}(\mathbf{r}(T))$  via the chain rule [49, 21]:

$$\Delta \mathbf{W}_{ij} \propto \frac{\partial \mathcal{L}(\mathbf{r}(T))}{\partial \bar{\mathbf{r}}(T)} \frac{\partial \bar{\mathbf{r}}(T, \mathbf{r})}{\partial \mathbf{W}_{ij}} \quad (\text{E.44})$$

$$\frac{\partial \bar{\mathbf{r}}(t, \mathbf{r})}{\partial \mathbf{W}_{ij}} = \frac{\partial \bar{\mathbf{r}}(t, \mathbf{r})}{\partial \bar{\mathbf{r}}(t-1, \mathbf{r})} \frac{\partial \bar{\mathbf{r}}(t-1, \mathbf{r})}{\partial \mathbf{W}_{ij}} + g(\mathbf{r}(t-1)) \quad (\text{E.45})$$

$$g(\mathbf{r}(t-1))_k = \begin{cases} h'(\mathbf{V}_i(t)) \mathbf{r}_j(t-1) & \text{if } i = k \\ 0 & \text{otherwise.} \end{cases} \quad (\text{E.46})$$

this second equation provides a recursive update equation which can be stored online as a trial progresses. The  $g(\mathbf{r}(t-1))$  term is  $p$ -local, because it appears in Eq. E.43. However,  $\frac{\partial \bar{\mathbf{r}}(t, \mathbf{r})}{\partial \bar{\mathbf{r}}(t-1, \mathbf{r})}$ , an  $N \times N$  Jacobian matrix, is not  $p$ -local, since it depends on all neurons in the network  $\mathbf{r}(t-1)$  as well as all parameters  $\mathbf{W}$ —neurons that do not directly synapse onto neuron  $\mathbf{r}_i$  and weights  $\mathbf{W}_{kl}$  for  $k \neq i$  are excluded from  $p$ -local updates by Property 2.1 according to the DAG defined by Eq. E.39. Furthermore, as we have seen with backpropagation, in general the credit assignment signal  $\frac{\partial \mathcal{L}(\mathbf{r}(T))}{\partial \bar{\mathbf{r}}(T)}$  is not  $p$ -local. Therefore, to characterize the  $\mathbf{S}p$ -locality of RTRL, we will have to proceed similarly to backpropagation, and define auxiliary variables to include in the set  $\mathbf{S}$ .

As with backpropagation, we define the auxiliary random variable  $\mathbf{e} = \frac{\partial \mathcal{L}(\mathbf{r}(T))}{\partial \bar{\mathbf{r}}(T)}$ . Because we have found the Jacobians to also violate  $p$ -locality, we will also define the set of auxiliary variables  $\mathbf{J} = \{\mathbf{J}(t) = \frac{\partial \bar{\mathbf{r}}(t, \mathbf{r})}{\partial \bar{\mathbf{r}}(t-1, \mathbf{r})}\}$ . With these auxiliary variables, we can see that  $\frac{\partial \bar{\mathbf{r}}(t, \mathbf{r})}{\partial \mathbf{W}_{ij}}$  is  $\mathbf{J}p$ -local  $\forall t$ , and consequently, the RTRL update is  $\mathbf{eJ}p$ -local.  $\square$

This is, of course, not biologically plausible in any way. The set  $\mathbf{J}$  allows the parameters to have access to the state of the entire network, at all time points, even from neurons that do not have any direct connections to the neuron whose synapse is being updated. Further, the entire error vector  $\mathbf{e}$  is required to compute the update. This is even less plausible than backpropagation, which only required access to  $\mathbf{e}_i$ . However, the RTRL update is an important baseline for analyzing the locality properties of other learning algorithms that are constructed as approximations of it, namely e-prop and RFLO.

## E.12 e-prop

**Theorem E.12.** *If  $p(\boldsymbol{\Theta}) = \prod_k p(\boldsymbol{\Theta}_k)$  and  $p(\mathbf{X}|\boldsymbol{\Theta})$  is defined by Eq. E.39 (with  $\mathbf{X} = \mathbf{r}$  and  $\boldsymbol{\Theta} = \mathbf{W}$ ), the e-prop update for  $\mathbf{W}_{ij}$  with a loss  $\mathcal{L}(\mathbf{r}(T))$ , given by  $\mathcal{A}_{ep}(p(\mathbf{r}|\mathbf{W}), \mathcal{L}(\mathbf{r}))$  is  $\mathbf{e}_i p$ -local, where  $\mathbf{e}_i = \frac{\partial \mathcal{L}(\mathbf{r}(T))}{\partial \bar{\mathbf{r}}_i(T)}$ .*

*Proof.* For e-prop [37], we will also consider networks constructed according to Eq. E.39. The update is almost identical to the RTRL update, but several terms will be discarded, allowing the update to be  $\mathbf{e}_i p$ -local, as opposed to the  $\mathbf{eJ}p$ -local update given by RTRL. The update is as follows:



$$\Delta \mathbf{W}_{ij} \propto \frac{\partial \mathcal{L}(\mathbf{r}(T))}{\partial \bar{\mathbf{r}}_i(T)} \frac{\partial \bar{\mathbf{r}}_i(T, \mathbf{r})}{\partial \mathbf{W}_{ij}} \quad (\text{E.47})$$

$$\frac{\partial \bar{\mathbf{r}}_i(t, \mathbf{r})}{\partial \mathbf{W}_{ij}} = h'(\mathbf{V}_i(t)) \mathbf{W}_{ii} \frac{\partial \bar{\mathbf{r}}_i(t-1, \mathbf{r})}{\partial \mathbf{W}_{ij}} + h'(\mathbf{V}_i(t)) \mathbf{r}_j(t-1). \quad (\text{E.48})$$

This update combines the neuron-specific credit assignment signal  $\mathbf{e}_i$  with a local ‘eligibility trace’  $\frac{\partial \bar{\mathbf{r}}_i(t, \mathbf{r})}{\partial \mathbf{W}_{ij}}$  which performs approximate credit assignment by filtering and summing coactivity between neuron  $i$  and neuron  $j$  across timesteps. It is worth noting that the particular functional form of this eligibility trace is determined by our simplified RNN dynamics (Eq. E.39), which causes coactivity from previous timesteps to decay exponentially in proportion to the magnitude of the autapse  $\mathbf{W}_{ii}$ —alternative neural network dynamics using continuous-time dynamics, or adaptive neural firing thresholds may alter the functional form of the eligibility trace [37], but do not fundamentally alter the  $p$ -locality properties of the update. Now, we only need to show that the eligibility trace is  $p$ -local.

As with RTRL, we can observe that  $h'(\mathbf{V}_i(t))$  and  $\mathbf{r}_j(t-1)$  both appear in the score function for our RNN (Eq. E.43) for all timesteps, as does  $\mathbf{W}_{ii} \subset \mathbf{W}_i$ . Because the score function is  $p$ -local, we know that these variables are all allowed under  $p$ -locality. The eligibility trace only depends on these terms, from both the current time step and, recursively, from previous timesteps. Therefore, the eligibility trace is  $p$ -local. The e-prop update is a multiplication between  $\mathbf{e}_i$  and the eligibility trace, so by Def. 2.3 the update is  $\mathbf{e}_i p$ -local. □

### E.13 Random feedback local online learning (RFLO)

The RFLO update [36] is nearly identical to the e-prop update, except we replace  $\mathbf{e}_i$  with an approximate credit assignment signal  $\hat{\mathbf{e}}_i$  (which replaces symmetric feedback weights with random connections, similar to Feedback Alignment).

The update is given by:

$$\Delta \mathbf{W}_{ij} \propto \hat{\mathbf{e}}_i \frac{\partial \bar{\mathbf{r}}_i(T, \mathbf{r})}{\partial \mathbf{W}_{ij}} \quad (\text{E.49})$$

$$\frac{\partial \bar{\mathbf{r}}_i(t, \mathbf{r})}{\partial \mathbf{W}_{ij}} = h'(\mathbf{V}_i(t)) \mathbf{W}_{ii} \frac{\partial \bar{\mathbf{r}}_i(t-1, \mathbf{r})}{\partial \mathbf{W}_{ij}} + h'(\mathbf{V}_i(t)) \mathbf{r}_j(t-1). \quad (\text{E.50})$$

Following exactly the same reasoning as with e-prop, we may show that this update is  $\hat{\mathbf{e}}_i p$ -local.

**Theorem E.13.** *If  $p(\Theta) = \prod_k p(\Theta_k)$  and  $p(\mathbf{X}|\Theta)$  is defined by Eq. E.39 (with  $\mathbf{X} = \mathbf{r}$  and  $\Theta = \mathbf{W}$ ), the RFLO update for  $\mathbf{W}_{ij}$  with a loss  $\mathcal{L}(\mathbf{r}(T))$ , given by  $\mathcal{A}_{RFLO}(p(\mathbf{r}|\mathbf{W}), \mathcal{L}(\mathbf{r}))$  is  $\hat{\mathbf{e}}_i p$ -local, where  $\mathbf{e}_i = \frac{\partial \mathcal{L}(\mathbf{r}(T))}{\partial \bar{\mathbf{r}}_i(T)}$ .*

### E.14 Feedback-based Online Local Learning Of Weights (FOLLOW)

The FOLLOW algorithm [50] is defined in terms of a particular continuous-time LIF circuit with postsynaptic potential kernels. For simplicity, we will focus our analysis on a linear version of the same circuit, disregarding the dynamic postsynaptic potentials and input stimuli. Disregarding these features does not affect the  $p$ -locality properties of the FOLLOW algorithm, but it would certainly degrade its performance on tasks.

The network dynamics are given by:

$$\mathbf{r}(t + \Delta t) = h(\mathbf{r}(t), \mathbf{e}(t)) + \sigma \boldsymbol{\eta} \quad (\text{E.51})$$

$$= \left(1 - \frac{\Delta t}{\tau}\right) \mathbf{r}(t) + \frac{1}{\tau} (\mathbf{W} \mathbf{r}(t) + k \mathbf{W}^{fb} \mathbf{e}(t)) \Delta t + \sigma \boldsymbol{\eta}, \quad (\text{E.52})$$

where  $\mathbf{W}^{fb}$  is an  $N \times N^o$  random feedback weight matrix,  $k$  is a positive constant, and  $\mathbf{e}(t)$  is an  $N^o$ -dimensional error feedback vector delivered at every timestep, with  $N^o$  the number of output dimensions. Because we are in continuous time, we will assume that  $\boldsymbol{\eta} \sim \mathcal{N}(0, \Delta t)$ .

Similar to RTRL, we can write the probability distribution for the network as:

$$p(\mathbf{r}|\mathbf{e}, \mathbf{W}) = p(\mathbf{r}(0)) \prod_t \prod_{i=1}^N p(\mathbf{r}_i(t + \Delta t)|\mathbf{r}(t), \mathbf{e}(t), \mathbf{W}) \quad (\text{E.53})$$

$$p(\mathbf{r}_i(t + \Delta t)|\mathbf{r}(t), \mathbf{e}(t), \mathbf{W}) \sim \mathcal{N}(h(\mathbf{r}(t), \mathbf{e}(t)), \sigma^2 \Delta t), \quad (\text{E.54})$$

where  $p(\mathbf{r}(0))$  is some initial distribution of firing rates. Further, we can assume that the distribution of errors at timestep  $t + \Delta t$  has any arbitrary distribution  $p(\mathbf{e}(t + \Delta t)|\mathbf{r}(t))$ .

The update for weight  $\mathbf{W}_{ij}$  is given by:

$$\Delta \mathbf{W}_{ij}(t) \propto \left( \mathbf{W}_{i:}^{fb}(\mathbf{e}(t)) \right) \mathbf{r}_j(t). \quad (\text{E.55})$$

Therefore, only the postsynaptic error current and presynaptic input are necessary to update the weights for a given synapse in this type of network. Below, we will show that this update is  $p$ -local.

**Theorem E.14.** *If  $p(\Theta) = \prod_k p(\Theta_k)$  and  $p(\mathbf{X}|\Theta)$  is defined by Eq. E.53 (with  $\mathbf{X} = \{\mathbf{r}, \mathbf{e}\}$  and  $\Theta = \mathbf{W}$ ), the FOLLOW update for  $\mathbf{W}_{ij}$ , given by  $\mathcal{A}_{FW}(p(\mathbf{r}, \mathbf{e}|\mathbf{W}))$  is  $p$ -local.*

*Proof.* To see that this is true, we need only show that the variables included in  $\Delta \mathbf{W}_{ij}$  are subsets of the variables included in the score function  $\frac{\partial \log p(\mathbf{r}, \mathbf{e}|\mathbf{W})}{\partial \mathbf{W}_{ij}}$ . These variables are permissible for  $p$ -local updates by Property 2.7. The score function is given by:

$$\frac{\partial \log p(\mathbf{r}, \mathbf{e}|\mathbf{W})}{\partial \mathbf{W}_{ij}} = \sum_t \frac{\partial \log p(\mathbf{r}(t + \Delta t)|\mathbf{r}(t), \mathbf{e}(t), \mathbf{W})}{\partial \mathbf{W}_{ij}} + \sum_t \frac{\partial \log p(\mathbf{e}(t + \Delta t)|\mathbf{r}(t))}{\partial \mathbf{W}_{ij}} \quad (\text{E.56})$$

$$= \sum_t \frac{\partial \log p(\mathbf{r}_i(t + \Delta t)|\mathbf{r}(t), \mathbf{e}(t), \mathbf{W})}{\partial \mathbf{W}_{ij}} \quad (\text{E.57})$$

$$= \sum_t \frac{\left( \mathbf{r}_i(t + \Delta t) - \mathbf{r}_i(t) + \frac{\Delta t}{\tau} \left( -\mathbf{r}_i(t) + \mathbf{W}_{i:} \mathbf{r}(t) + k \mathbf{W}_{i:}^{fb}(\mathbf{e}(t)) \right) \right)}{\Delta t \sigma^2} \mathbf{r}_j(t). \quad (\text{E.58})$$

Therefore, for weight  $\Delta \mathbf{W}_{ij}$ , the permissible variables include:  $\mathbf{r}_i(t) \forall t$ , any  $\mathbf{r}_k(t)$  such that  $\mathbf{W}_{ik} \neq 0$  ( $\forall t$ ), any  $\mathbf{e}_k(t)$  such that  $\mathbf{W}_{ik}^{fb} \neq 0$  ( $\forall t$ ), and the parameters  $\mathbf{W}_{i:}$  and  $\mathbf{W}_{i:}^{fb}$ . The parameter update requires only  $\mathbf{r}_j(t)$  and  $\mathbf{W}_{i:}^{fb}(\mathbf{e}(t))$ , which is a subset of these permissible variables. Therefore, the update is  $p$ -local.  $\square$

## F $p$ -locality does not guarantee biological plausibility

It is very important to clarify the exact relationship between  $p$ -locality and biological plausibility. Except for some network-wide variables that a theoretician may decide to allow through a particular choice of  $\mathcal{S}p$ -locality, we have generally shown that  $p$ -locality is *overly permissive*, in that a particular choice of  $p$  may allow parameter updates to include variables that an individual synapse may not have access to. Furthermore,  $p$ -locality does *not* restrict the network architecture defined by  $p$  to be biologically plausible. The best way to interpret  $p$ -locality is as follows: if  $p(\mathbf{X}, \Theta)$  defines a biologically plausible architecture *and* an algorithm  $\mathcal{A}$  is  $p(\mathbf{X}, \Theta)$ -local, then the parameter update provided by  $\mathcal{A}(p(\mathbf{X}, \Theta))$  will be biologically plausible. There are many network architecture and parameter update combinations that may be biologically plausible without being proven  $p$ -local (e.g. explicit approximations to backpropagation [29, 30, 31]), as there are many combinations that are  $p$ -local without being biologically plausible. Below, we will show two important instances in which  $p$ -locality does not properly diagnose a combination of network architecture and parameter update as biologically implausible.

### F.1 Locality and architectural plausibility

The first example is pervasive in neural network models of the brain: networks frequently violate Dale’s law, which states that neurons in a neural network are (for the most part [51]) either excitatory

(outgoing weights are positive) or inhibitory (outgoing weights are negative), but not both. In fact, in the simple network example we have provided (Section 2.4), neural firing rates are not constrained to be strictly positive, and outgoing synaptic weights are not sign-constrained. For this biologically implausible architecture,  $p$ -locality defines which variables are allowed to be included in individual parameter updates in a way that is sensible (allowing only variables involving the postsynaptic firing rate and the firing rates of all pre-synaptic neurons), but it says nothing about the aforementioned implausibilities of the network architecture. Similarly, the linear Boltzmann machine example provided in Appendix D does not constrain firing rates to be positive, and requires symmetric weights ( $\mathbf{W}_{ij} = \mathbf{W}_{ji}$ ), which could not satisfy Dale’s law while allowing connections between an inhibitory neuron  $i$  and an excitatory neuron  $j$  ( $\mathbf{W}_{ij} > 0$  while  $\mathbf{W}_{ji} < 0 \Rightarrow \mathbf{W}_{ij} \neq \mathbf{W}_{ji}$ ).

These examples illustrate an important fact:  $p$ -locality focuses on the plausibility of updates *given* an architecture that has been predetermined to be acceptable. However, it is worth noting that if we were to impose these additional constraints for the proposed networks, the accepted variables determined by  $p$ -locality would not change.

## F.2 Parameterizing probabilities with neural networks

Another important caveat when working with  $p$ -locality is that the random variables  $\mathbf{Z}$  have to correspond to the relevant biophysical quantities of interest, e.g. neural firing rates  $\mathbf{X}$  and synaptic weights  $\Theta$ . If this is not the case, then  $p$ -locality can easily defy standard notions of biological plausibility. For instance, if we define a probability distribution in terms of a 3-layer neural network:

$$p(\mathbf{X}|\Theta) \sim \mathcal{N}(\bar{\mathbf{r}}^2(\bar{\mathbf{r}}^1(\bar{\mathbf{r}}^0(\Theta))), \sigma^2), \quad (\text{F.1})$$

Then the score function of this distribution is given by:

$$\frac{\partial p(\mathbf{X}|\Theta)}{\partial \Theta} = \frac{d \log p(\mathbf{X}|\Theta)}{d\bar{\mathbf{r}}^2} \frac{d\bar{\mathbf{r}}^2}{d\bar{\mathbf{r}}^1} \frac{d\bar{\mathbf{r}}^1}{d\bar{\mathbf{r}}^0} \frac{d\bar{\mathbf{r}}^0}{d\Theta}. \quad (\text{F.2})$$

This equation depends on  $\mathbf{X}$ , which is the output of the network, even though  $\Theta$  parameterizes  $\bar{\mathbf{r}}^{(0)}$ . Therefore, if the random variables had been defined in as in Section 2.4, then this update would not be  $p$ -local. However, because it is the derivative of the score function, for any independent marginal  $p(\Theta)$ , it is  $p$ -local for this choice of random variables. Therefore, it is important when working with an algorithm such as Wake-Sleep or REINFORCE, that one chooses a conditional probability distribution  $p(\mathbf{X}|\Theta)$  that captures biologically plausible dependencies. When this is not done, as in [52, 53], the resulting updates have no correspondence to synaptic plasticity rules.

Note that this fact does not undermine the utility of  $p$ -locality as a concept. Our proofs for algorithms in Appendix E apply for *any*  $p(\mathbf{X}|\Theta)$ , as long as  $p(\Theta)$  factorizes to  $\prod_i p(\Theta_i)$ . Therefore, algorithms that have universal  $p$ -local properties will respect the variable dependencies implied by  $p(\mathbf{X}|\Theta)$  whether this distribution is plausible or not, which means that the algorithms will respect variable dependencies for *all* plausible network architectures.
